## REFERENCES

1. Trudell JR: A unitary theory of anesthesia based on lateral phase separations in nerve membranes. *ANESTHESIOLOGY* 46:5-10, 1977
2. Lee AG: Model for action of local anesthetics. *Nature* 262:545-548, 1976
3. Browning JL: Discussion of the effects of local anesthetic-type drugs on membranes: A model for electrical excitability, studies on the excitable membrane of *Paramecium aurelia*. Ph.D. Thesis, University of Wisconsin, Madison, 1976, pp 77-93
4. Sheetz MP, Singer SJ: Biological membranes as bilayer couples. A molecular mechanism of drug-erythrocyte interactions. *Proc Natl Acad Sci USA* 71:4457-4461, 1974
5. Trudell JR, Hubbell WL, Cohen EN: The effect of two inhalation anesthetics on the order of spin-labeled phospholipid vesicles. *Biochim Biophys Acta* 291:321, 1973
6. Rosenberg PH, Eibl H, Stier A: Biphasic effects of halothane on phospholipid and synaptic plasma membranes: A spin label study. *Mol Pharmacol* 11:879-882, 1975
7. Hsia JC, Boggs JM: Protein perturbation hypothesis of anesthesia. *Prog Anesthesiol* 1:327-338, 1975
8. Miller KM, Pang KY: General anesthetics can selectively perturb lipid bilayer membranes. *Nature* 263:253-255, 1976

(Accepted for publication July 11, 1977.)

Anesthesiology  
47:534, 1977

## Location of CVP Catheters

*To the Editor:*—Drs. Burgess, Marino and Peuler<sup>1</sup> are not correct in their claim that the effects of head position on the location of venous catheters had not been previously reported. We published our findings from a randomized trial in 46 patients in 1975.<sup>2</sup> In contrast to Dr. Burgess and his co-workers, we found that there seemed to be no benefit from turning the patient's head towards the side of insertion. Neck compression provided a quick and simple method for detecting a malpositioned catheter tip in the internal jugular vein, an increase in the recorded pressure of 10 cm H<sub>2</sub>O or more being seen when pressure was applied to the root of that side of the neck.

Anesthesiology  
47:534, 1977

JEAN LUMLEY M.B., B.S., F.F.A.R.C.S.  
W. J. RUSSELL M.B., B.S., F.F.A.R.C.S.  
*Departments of Anaesthesia  
Royal Postgraduate Medical School  
London, England, and  
Royal Adelaide Hospital  
Adelaide, S. Australia*

## REFERENCES

1. Burgess GE III, Marino RJ, Peuler MJ: Effect of head position on the location of venous catheters inserted via basilic veins. *ANESTHESIOLOGY* 46:212-213, 1977
2. Lumley J, Russell WJ: Insertion of central venous catheters through arm veins. *Anaesth Intens Care* 3:101-104, 1975

(Accepted for publication July 14, 1977.)

## Topical Anesthesia Lessons Sore Throats from Tubes

*To the Editor:*—Dr. Menias,<sup>1</sup> in discussing the article by Loeser *et al.*,<sup>2</sup> speculated that the use of lidocaine, 5 per cent, ointment might have been responsible for the appearance of the sore throats reported in that study. He cites his clinical impression that the use of non-anesthetic lubricants has decreased the incidence of postoperative sore throat in his patients. In 1965, Lund and Daos<sup>3</sup> reported data that do not support Dr. Menias' supposition. They examined the incidence of postoperative sore throat in a series of 1,025 patients whose tracheas were intubated during general anesthesia. Patients were assigned to one of five treatment groups in which the endotracheal tubes were coated with: 1) nothing; 2) a heavy viscous base; 3) a heavy base containing lidocaine, 5 per cent; 4) a light foamy base; or 5) a light foamy base with pramoxine, 1 per cent. The incidences of sore throat in groups 2, 4 and 5 were virtually the same as that in the control group (about 22 per cent). Sore throat

was significantly less frequent (6.6 per cent,  $P < 0.001$ ) only in group 3. Available evidence indicates that lidocaine, 5 per cent, ointment decreases, not increases, the incidence of postoperative sore throat.

THOMAS J. POULTON, M.D.  
*Chief Resident, Department of Anesthesia  
North Carolina Baptist Hospitals  
300 South Hawthorne Road  
Winston-Salem, North Carolina 27103*

## REFERENCES

1. Menias OM: Sore throat postoperatively from topical anesthesia. *ANESTHESIOLOGY* 46:438, 1977
2. Loeser EA, Orr DL, Bennett GM, et al: Endotracheal tube cuff design and postoperative sore throat. *ANESTHESIOLOGY* 45:684-687, 1976
3. Lund LO, Daos FG: Effects on postoperative sore throats of two analgesic agents and lubricants used with endotracheal tubes. *ANESTHESIOLOGY* 26:681-683, 1965

(Accepted for publication August 4, 1977.)
